# Supplementary material for: An exclusive deposition method of silver nanoparticles on TiO2 particles via low-temperature decomposition of silver-alkyldiamine complexes in aqueous media
Source: Royal Society of Chemistry journal article supplement (doi:10.1039/c9ra10307d), 2020-01-01
Supplement: c9ra10307d1.pdf [file c9ra10307d1.pdf]

## Supplementary Information

An exclusive deposition method of silver nanoparticles on TiO<sub>2</sub> particles *via*  
low-temperature decomposition of silver-alkyldiamine complexes in aqueous media

Tomohiro Yahagi,<sup>a,b</sup> Takanari Togashi,<sup>a</sup> and Masato Kurihara<sup>\*a</sup>

<sup>a</sup>Faculty of Science, Yamagata University,

1-4-12 Kojirakawa-machi, Yamagata 990-8560, Japan.

<sup>b</sup>Technical Support Center, National Institute of Technology, Tsuruoka College,

104 Sawada, Inooka, Tsuruoka, Yamagata 997-8511, Japan.

(E-mail: [kurihara@sci.kj.yamagata-u.ac.jp](mailto:kurihara@sci.kj.yamagata-u.ac.jp))

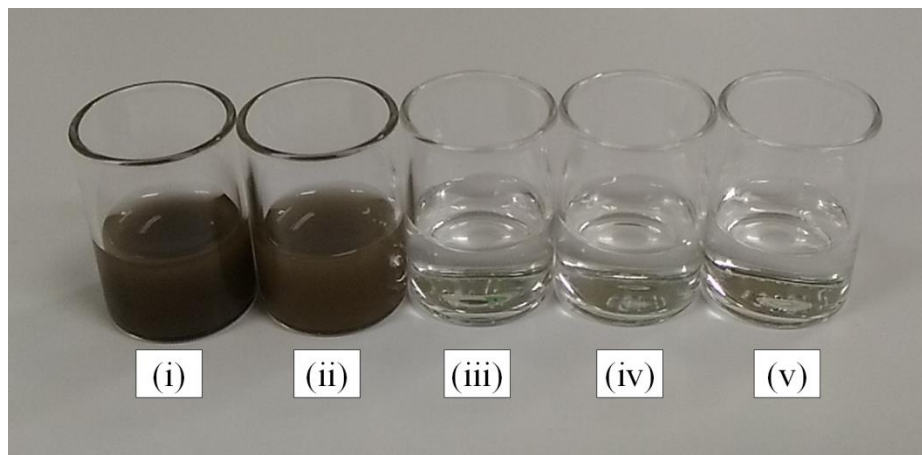

Fig. S1 The photographs of aqueous solutions of  $\text{AgNO}_3$  in the presence of different molar ratios of dmpda, where the ratios of dmpda to  $\text{AgNO}_3$  were 1.0 (i), 1.5 (ii), 2.0 (iii), 4.0 (iv) and 8.0 (v) mole/mole. These solutions were aqueous mixtures of water (10 mL), 772  $\mu\text{L}$  of an aqueous solution of  $\text{AgNO}_3$  ( $1.00 \text{ mol L}^{-1}$ ), and the various molar ratios of dmpda.

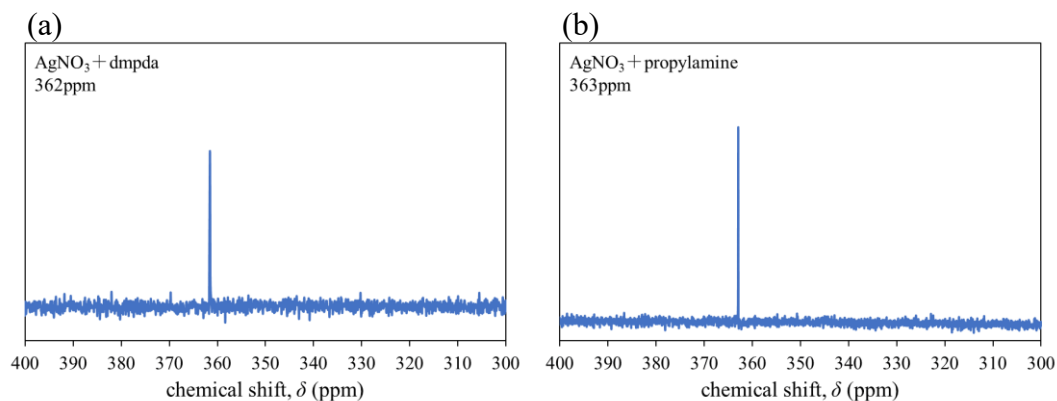

Fig. S2  $^{109}\text{Ag}$ -NMR spectra of a transparent and colourless aqueous mixture of  $\text{AgNO}_3$  and an alkylamine, dmpda (a) or propylamine (b), with a molar ratio of 1 : 4 mole/mole. The aqueous solution composed of  $\text{AgNO}_3$  (3.13 mmol), alkylamine (12.5 mmol) and water (4 mL), and  $\text{D}_2\text{O}$  (1 mL) was further added into the aqueous solution as a D-lock solvent. An aqueous solution of  $\text{AgNO}_3$  without alkylamines shows one signal at 0 ppm which is employed as a standard signal for calibrating chemical shifts ( $\delta$ ) of  $^{109}\text{Ag}$ -NMR spectra.

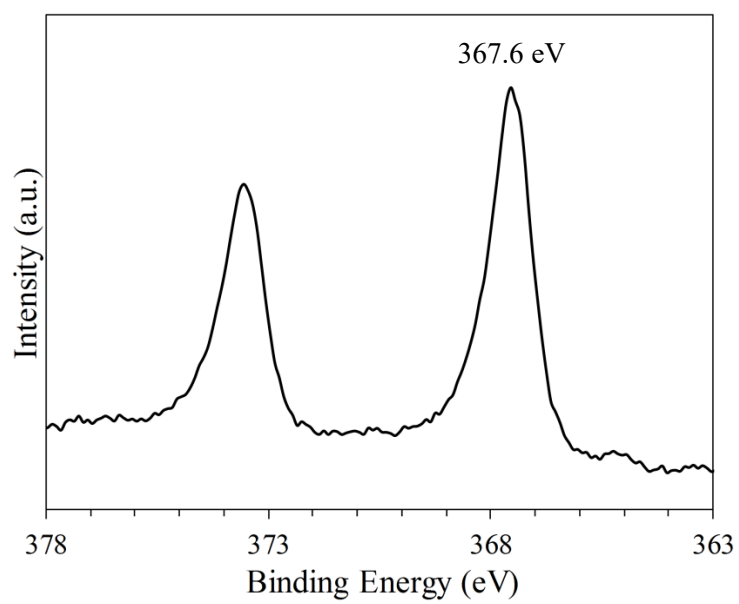

Fig. S3 XPS spectrum derived from the 3d orbitals of Ag in Ag<sub>4</sub>/TiO<sub>2</sub> sample.

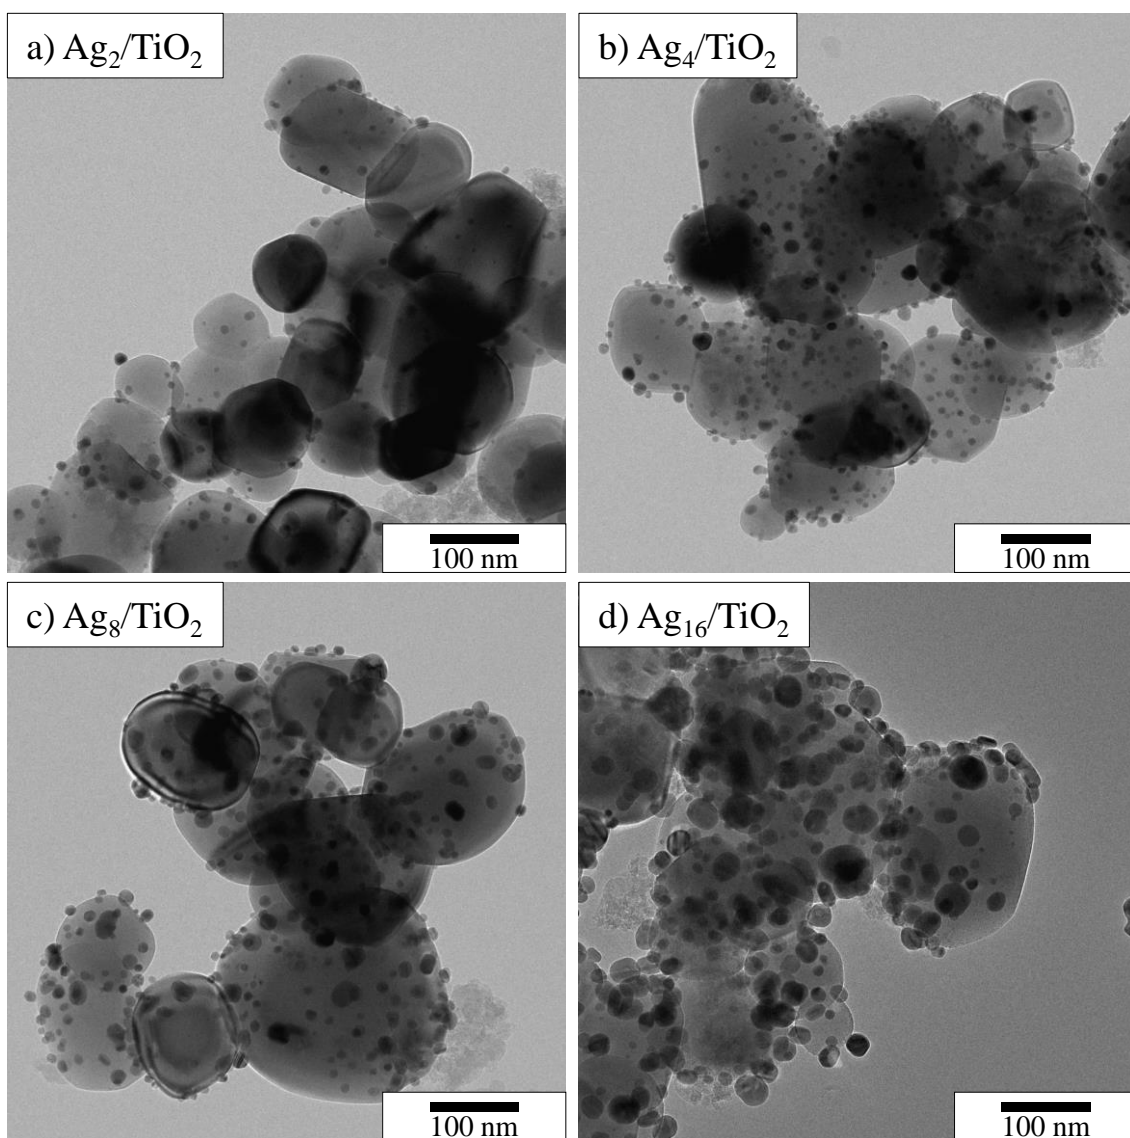

Fig. S4 TEM images of  $\text{Ag}_x/\text{TiO}_2$  samples after the catalytic reactions in the cases of  $x = 2$  (a), 4 (b), 8 (c) and 16 (d).
